# Supplementary material for: Efficient improvement in the electrochemical performance of petal-like lamellar NiMn–LDHs with affluent oxygen vacancies derived from Mn MOF-74
Source: Royal Society of Chemistry journal article supplement (doi:10.1039/d3dt03807f), 2024-01-01
Supplement: d3dt03807f1.pdf [file d3dt03807f1.pdf]

## **Electronic Supplementary Information**

### **Preparation and electrochemical properties of NiMn-LDH with petal-like lamellar structure derived from Mn MOF-74**

Jing Shi, Hongbo Tai, Dongwei Xu, Xiaomin Kang\* and Zhiliang Liu\*

*Inner Mongolia Key Laboratory of Chemistry and Physics of Rare Earth Materials,  
College of Chemistry and Chemical Engineering, Inner Mongolia University, Hohhot,  
010021, PR China.*

E-mail: kangxm@imu.edu.cn, E-mail: cezliu@imu.edu.cn

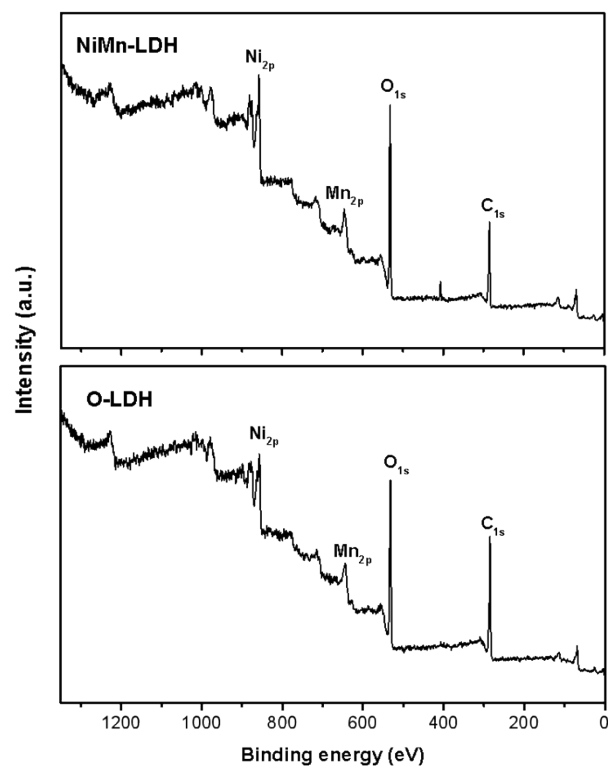

**Fig. S1** The full XPS spectra of NiMn-LDH 3 and O-LDH samples.

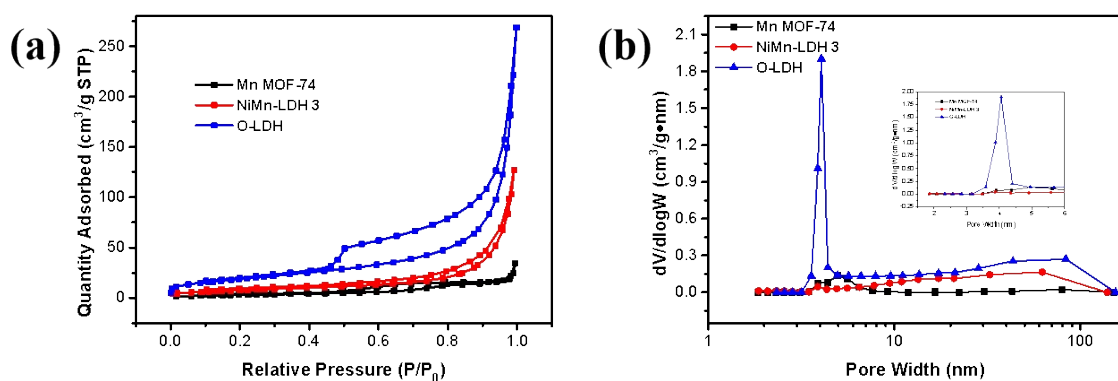

**Fig. S2** (a)  $N_2$  adsorption/desorption isotherms of Mn MOF-74, NiMn-LDH 3 and O-LDH; (b) corresponding pore size distribution curves of Mn MOF-74, NiMn-LDH 3 and O-LDH.

**Table S1** O 1s peak for NiMn-LDH 3 and O-LDH materials.

| Binding energy<br>(eV) | Relative peak area |                 |                  |
|------------------------|--------------------|-----------------|------------------|
|                        | O <sup>2-</sup>    | OH <sup>-</sup> | H <sub>2</sub> O |
| NiMn-LDH               | 2196.6             | 14645.2         | 10916.8          |
| O-LDH                  | 2728.7             | 11437.8         | 10036.9          |

**Table S2** Mn 2p peak for NiMn-LDH 3 and O-LDH materials.

| Binding energy<br>(eV) | Relative peak area |                  |                  |
|------------------------|--------------------|------------------|------------------|
|                        | Mn <sup>2+</sup>   | Mn <sup>3+</sup> | Mn <sup>4+</sup> |
| NiMn-LDH               | 686.3              | 527.6            | 2216.6           |
| O-LDH                  | 1444.2             | 1105.1           | 2411.7           |

**Table S3** The analysis results of XPS for NiMn-LDH 3 and O-LDH materials.

|          | Relative content of O <sup>2-</sup> | Relative content of OH <sup>-</sup> | OH <sup>-</sup> /O <sup>2-</sup> | Relative content of Mn <sup>2+</sup> | Relative content of Mn <sup>3+</sup> | Relative content of Mn <sup>4+</sup> |
|----------|-------------------------------------|-------------------------------------|----------------------------------|--------------------------------------|--------------------------------------|--------------------------------------|
| NiMn-LDH | 7.9%                                | 52.8%                               | 6.7                              | 20.0%                                | 15.4%                                | 64.6%                                |
| O-LDH    | 11.3%                               | 47.3%                               | 4.2                              | 29.1%                                | 22.3%                                | 48.6%                                |

**Table S4** Pore structure parameters of Mn MOF-74, NiMn-LDH 3 and O-LDH materials.

| Materials  | S <sub>BET</sub> (m <sup>2</sup> /g) | V <sub>total</sub> (cm <sup>3</sup> /g) | Average pore diameter (nm) |
|------------|--------------------------------------|-----------------------------------------|----------------------------|
| Mn MOF-74  | 20.25                                | 0.04                                    | 13.43                      |
| NiMn-LDH 3 | 46.10                                | 0.19                                    | 27.16                      |
| O-LDH      | 111.33                               | 0.35                                    | 20.40                      |

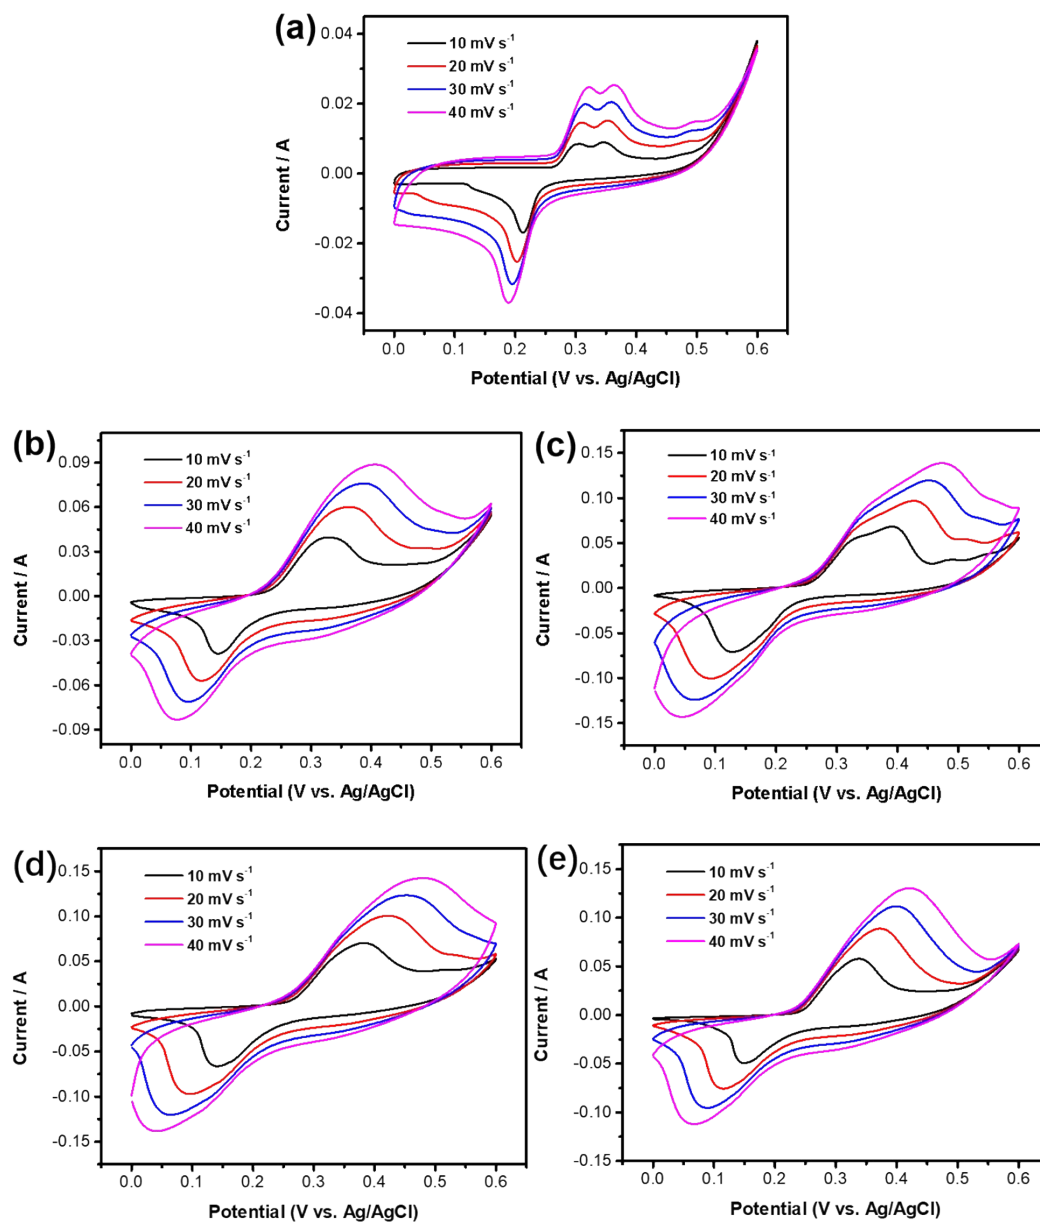

**Fig. S3** Cyclic Voltammetry (CV) curves of Mn MOF-74/NF (a), NiMn-LDH 1/NF (b), NiMn-LDH 2/NF (c), NiMn-LDH 4/NF (d) and NiMn-LDH 5/NF (e) electrodes at various scan rates (10-40 mV s<sup>-1</sup>).

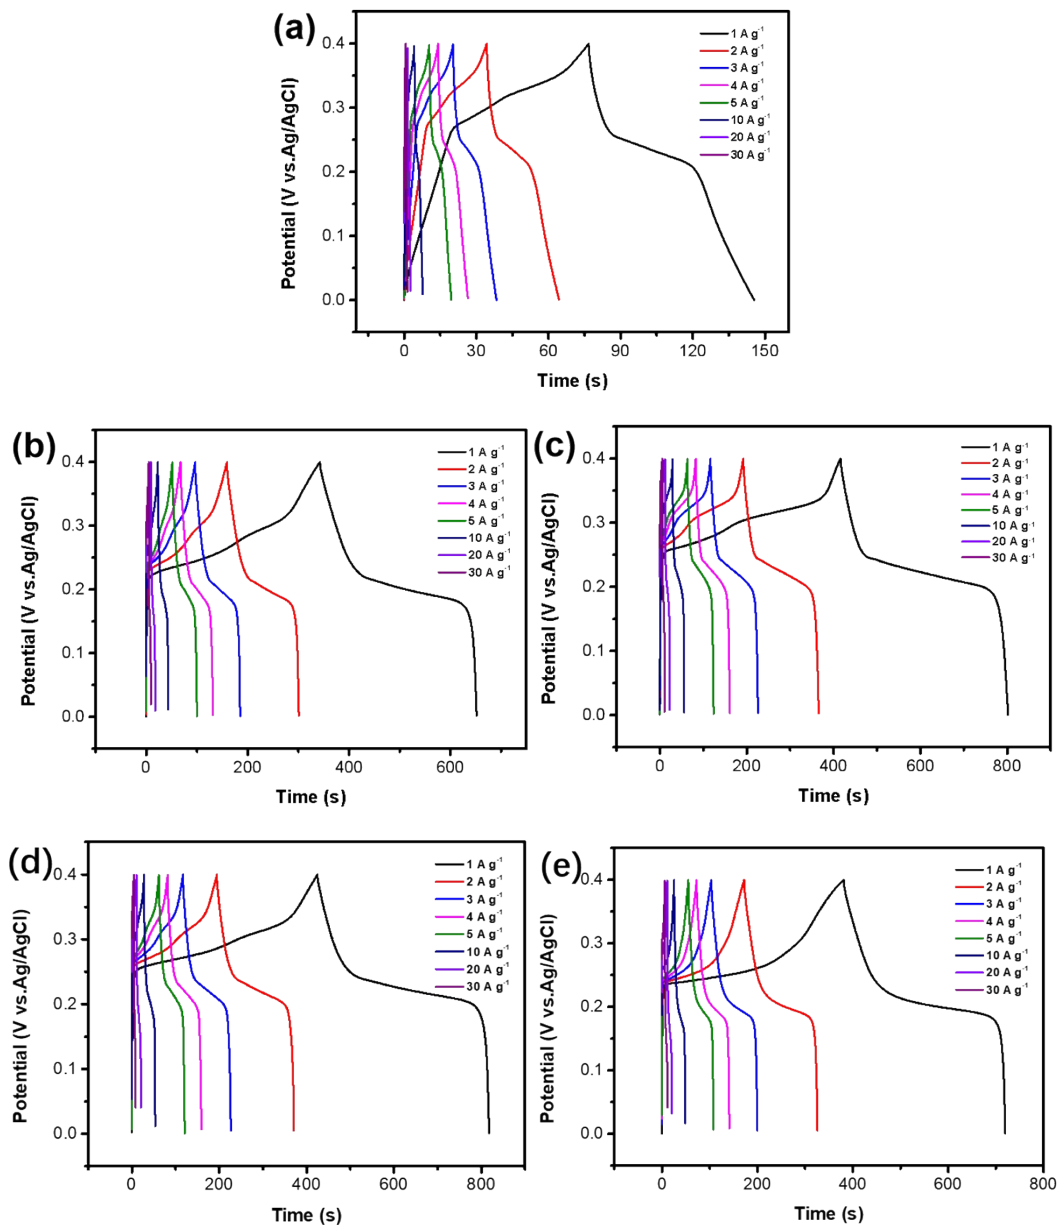

**Fig. S4** Galvanostatic charge-discharge (GCD) curves of Mn MOF-74/NF (a), NiMn-LDH 1/NF (b), NiMn-LDH 2/NF (c), NiMn-LDH 4/NF (d) and NiMn-LDH 5/NF (e) electrodes at various current densities (1-30 A g<sup>-1</sup>).

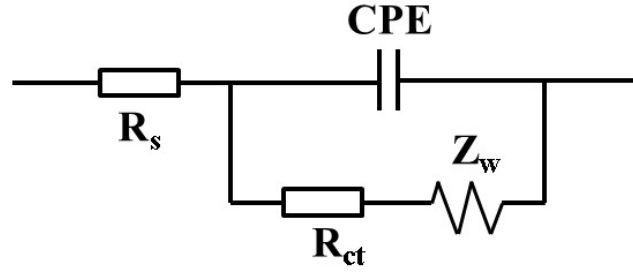

**Fig. S5** the equivalent circuit fitting diagram of the EIS data.

**Table S5** Comparison of supercapacitor electrochemical performance between the previously reported materials and the active material O-LDH.

| Electrode materials                                                          | Specific capacitance    | Current density       | Rate capability                | Reference |
|------------------------------------------------------------------------------|-------------------------|-----------------------|--------------------------------|-----------|
| NiMn-LDH/PC                                                                  | 1634 F g <sup>-1</sup>  | 1 A g <sup>-1</sup>   | 60.5% at 10 A g <sup>-1</sup>  | 1         |
| Ni/Mn LDHs microspheres                                                      | 1379 F g <sup>-1</sup>  | 1 A g <sup>-1</sup>   | 75.1% at 50 mV s <sup>-1</sup> | 2         |
| Ni-Mn LDH/Co <sub>3</sub> O <sub>4</sub> on carbon paper                     | 1327 F g <sup>-1</sup>  | 1 A g <sup>-1</sup>   | 70.9% at 50 mV s <sup>-1</sup> | 3         |
| Ni-Mn LDH@Co <sub>3</sub> O <sub>4</sub> on nickel foam                      | 607.9 F g <sup>-1</sup> | 0.5 A g <sup>-1</sup> | 73% at 5 A g <sup>-1</sup>     | 4         |
| Mn <sub>3</sub> O <sub>4</sub> /NiMoO <sub>4</sub> @NiCo LDH on carbon cloth | 815 F g <sup>-1</sup>   | 1 A g <sup>-1</sup>   | 76.92% at 5 A g <sup>-1</sup>  | 5         |
| NiMn-LDH/Mxene                                                               | 1575 F g <sup>-1</sup>  | 0.5 A g <sup>-1</sup> | 91.8% at 2 A g <sup>-1</sup>   | 6         |
| ZIF-9@CoAl LDH                                                               | 702.7 F g <sup>-1</sup> | 1 A g <sup>-1</sup>   | 75% at 8 A g <sup>-1</sup>     | 7         |

|                                            |                         |                     |                                |                  |
|--------------------------------------------|-------------------------|---------------------|--------------------------------|------------------|
| NiMnMg-LDH                                 | 1772 F g <sup>-1</sup>  | 1 A g <sup>-1</sup> | 74% at 3 A g <sup>-1</sup>     | 8                |
| KCu <sub>7</sub> S <sub>4</sub> @NiMn LDHs | 733.8 F g <sup>-1</sup> | 1 A g <sup>-1</sup> | 84.8% at 2.5 A g <sup>-1</sup> | 9                |
| NiMn-LDH/CNTs/rGO                          | 1268 F g <sup>-1</sup>  | 1 A g <sup>-1</sup> | 69.4% at 10 A g <sup>-1</sup>  | 10               |
| O-LDH                                      | 1875 F g <sup>-1</sup>  | 1 A g <sup>-1</sup> | 71.7% at 3 A g <sup>-1</sup>   | <b>This work</b> |

---



## References

- 1 M. Yu, R. Liu, J. Liu, S. Li and Y. Ma, *Small*, 2017, **13**, 1702616.
- 2 T. Li, J. Wang, Y. Xu, Y. Cao, H. Lin and T. Zhang, *ACS Appl. Energy Mater.*, 2018, **1**, 2242-2253.
- 3 L. Ouyang, C. H. Hsiao, Y. C. Chen, C. Y. Lee and N. H. Tai, *Surf. Interfaces*, 2022, **28**, 101574.
- 4 H. Peng, C. Jing, J. Chen, D. Jiang, X. Liu, B. Dong, F. Dong, S. Li and Y. Zhang, *CrystEngComm*, 2019, **21**, 470-477.
- 5 R. Liang, S. Liu, J. Lin, J. Dai, J. Peng, P. Huang, J. Chen and P. Xiao, *RSC Adv.*, 2023, **13**, 33463-33470.
- 6 D. Zhang, J. Cao, X. Zhang, N. Insin, R. Liu and J. Qin, *ACS Appl. Energy Mater.*, 2020, **3**, 5949-5964.
- 7 G. Wang, Y. Li and Z. Jin, *New J. Chem.*, 2020, **44**, 7528-7540.
- 8 B. Zhang, Y. Yang, J. Cai, X. Hou, C. Yi, X. Liao, Y. Liu, C. Chen, D. Yu and X. Zhou, *Dalton Trans.*, 2023, **52**, 10557-10566.
- 9 X. L. Guo, J. M. Zhang, W. N. Xu, C. G. Hu, L. Sun and Y. X. Zhang, *J. Mater. Chem. A*, 2017, **5**, 20579-20587.
- 10 M. Li, F. Liu, X. B. Zhang and J. P. Cheng, *Phys. Chem. Chem. Phys.*, 2016, **18**, 30068-30078.
